# Supplementary material
Source: Royal Society of Chemistry journal article supplement (https://www.rsc.org/suppdata/cc/1999/1643/904711e.doc)
Supplement: Supplementary file 1 [file 904711e.doc]

      Table 1.  Crystal data and structure refinement for Boc-Ile-Thr-NH2.
  
  
      Identification code               Boc-Ile-Thr-NH2
  
      Empirical formula                 C15 H29 N3 O5 
  
      Formula weight                    331.26 
  
      Temperature                       293(2) K 
  
      Wavelength                        1.54180 A 
  
      Crystal system, space group       Orthorhombic,  P212121
  
      Unit cell dimensions              a = 8.040(2) A   alpha = 90.000(10) deg. 
                                        b = 12.582(2) A    beta = 90.000(10) deg. 
                                        c = 18.128(2) A   gamma = 90.000(10) deg. 
  
      Volume                            1833.8(6) A^3 
  
      Z, Calculated density             4,  1.204 Mg/m^3 
  
      Absorption coefficient            0.743 mm^-1 
  
      F(000)                            724 
  
      Crystal size                      1.1 x 0.7 x 0.25 mm 
  
      Theta range for data collection   4.28 to 79.75 deg. 
  
      Limiting indices                  0<=h<=10, 0<=k<=16, 0<=l<=23 
  
      Reflections collected / unique    2252 / 2251 [R(int) = 0.1083] 
  
      Completeness to theta = 79.75     98.6 % 
  
      Refinement method                 Full-matrix least-squares on F^2 
  
      Data / restraints / parameters    2251 / 0 / 210 
  
      Goodness-of-fit on F^2            0.691 
  
      Final R indices [I>2sigma(I)]     R1 = 0.0548, wR2 = 0.1605 
  
      R indices (all data)              R1 = 0.0776, wR2 = 0.1864 
  
      Absolute structure parameter      -0.2(5) 
  
      Extinction coefficient            0.0020(7) 
  
      Largest diff. peak and hole       0.274 and -0.226 e.A^-3 
 
 
         Table 2.  Atomic coordinates ( x 10^4) and equivalent isotropic 
         displacement parameters (A^2 x 10^3) for Boc-Ile-Thr-NH2. 
         U(eq) is defined as one third of the trace of the orthogonalized 
         Uij tensor. 
  
         ________________________________________________________________ 
  
                         x             y             z           U(eq) 
         ________________________________________________________________ 
  
          C(1)        13576(7)       5774(5)       4557(3)       75(2) 
          C(2)        11195(9)       7019(4)       4634(3)       78(2) 
          C(3)        10791(10)      5052(6)       4825(3)       93(2) 
          C(4)        11726(6)       5905(4)       4427(2)       48(1) 
          O(1)        11588(3)       5748(3)       3628(2)       52(1) 
          C(5)        10104(5)       5801(3)       3286(2)       40(1) 
          O(2)         8807(4)       6026(3)       3578(2)       61(1) 
          N(1)        10309(3)       5589(3)       2569(2)       39(1) 
          C(6)         8931(4)       5576(3)       2057(2)       35(1) 
          C(7)         9530(5)       5904(3)       1290(2)       44(1) 
          C(8)         8207(6)       5725(4)        701(3)       59(1) 
          C(9)        10055(7)       7082(4)       1303(3)       67(1) 
          C(10)       11097(10)      7418(6)        663(5)      109(3) 
          C(11)        8181(4)       4467(3)       2018(2)       36(1) 
          O(3)         9009(3)       3674(2)       1887(2)       49(1) 
          N(2)         6523(3)       4431(3)       2106(2)       41(1) 
          C(12)        5532(4)       3502(3)       1993(2)       37(1) 
          C(13)        5760(5)       2687(4)       2612(3)       68(2) 
          O(4)         5003(4)       1708(3)       2365(3)       92(2) 
          C(14)        5044(9)       3041(7)       3324(4)      108(3) 
          C(15)        3731(4)       3873(3)       1924(2)       37(1) 
          O(5)         3395(3)       4815(2)       2015(2)       56(1) 
          N(3)         2613(4)       3147(3)       1768(2)       46(1) 
         ________________________________________________________________ 
   
